# Supplementary material for: Changes in the lipid profile of hamster liver after Schistosoma mansoni infection, characterized by mass spectrometry imaging and LC–MS/MS analysis
Source: PubMed Central journal article supplement (PMC9035427; doi:10.1007/s00216-022-04006-6), 2022-03-23
Supplement: 216_2022_4006_MOESM1_ESM.pdf [file 216_2022_4006_MOESM1_ESM.pdf]

## Supplementary information

### **Changes in the lipid profile of hamster liver after *Schistosoma mansoni* infection, characterized by mass spectrometry imaging and LC-MS/MS analysis**

Katja R. Wiedemann<sup>1</sup>, Alejandra Peter Ventura<sup>1</sup>, Stefanie Gerbig<sup>1</sup>, Martin Roderfeld<sup>2</sup>,  
Thomas Quack<sup>3</sup>, Christoph G. Grevelding<sup>3</sup>, Elke Roeb<sup>2</sup>, Bernhard Spengler<sup>1#</sup>

<sup>1</sup>*Institute of Inorganic and Analytical Chemistry, Justus Liebig University Giessen, Giessen, Germany*

<sup>2</sup>*Gastroenterology, Justus Liebig University Giessen, Giessen, Germany*

<sup>3</sup>*Institute for Parasitology, Justus Liebig University Giessen, Giessen, Germany*

# Author to whom correspondence should be addressed

[e-Mail address: bernhard.spengler@anorg.chemie.uni-giessen.de](mailto:bernhard.spengler@anorg.chemie.uni-giessen.de)

## Chemicals

Table S1: Used chemicals and their specifications.

| Chemical name                    | Quality grade         | manufacturer                                  |
|----------------------------------|-----------------------|-----------------------------------------------|
| 1,5-diaminonaphthalene (DAN)     | 97%                   | Acros Organics, Geel, Belgium                 |
| 2,5-dihydroxy benzoic acid (DHB) | for synthesis         | Merck, Darmstadt, Germany                     |
| 2-propanol                       | for HPLC              | Chemsolute, Renningen, Germany                |
| acetone                          | HiPerSolv             | VWR International, Fontenay-sous-Bois, France |
| ammonium formate                 | 99.995%               | Sigma-Aldrich, Steinheim, Germany             |
| acetonitrile                     | HiPerSolv             | VWR International, Fontenay-sous-Bois, France |
| Eosin Y solution                 |                       | Sigma-Aldrich, Steinheim, Germany             |
| ethanol                          | Uvasol                | Merck, Darmstadt, Germany                     |
| Eukitt quick hardening medium    |                       | Sigma-Aldrich, Steinheim, Germany             |
| formic acid                      | for mass spectrometry | Honeywell, Morris Plains, NJ, USA             |
| Mayer's hematoxylin solution     |                       | Sigma-Aldrich, Steinheim, Germany             |
| methanol                         | LiChroSolv            | Merck, Darmstadt, Germany                     |
| Methyl-tert-butylether (MTBE)    | for HPLC              | Sigma-Aldrich, Steinheim, Germany             |
| Oil Red                          |                       | Sigma-Aldrich, Steinheim, Germany             |
| paraformaldehyde                 |                       | Roth, Karlsruhe, Germany                      |
| phosphate buffered saline (PBS)  |                       | Gibco, Carlsbad, CA, USA                      |
| trifluoro acetic acid            | Uvasol                | Merck, Darmstadt, Germany                     |
| water                            | HiPerSolv             | VWR International, Fontenay-sous-Bois, France |
| xylene                           | for analysis          | Merck, Darmstadt, Germany                     |

## MALDI MSI measurements

Table S2: Settings used for data acquisition with MALDI MSI.

| Parameter             | Setting                                                                                     |
|-----------------------|---------------------------------------------------------------------------------------------|
| $m/z$                 | 250-1000                                                                                    |
| Ion mode              | Positive and negative                                                                       |
| Resolution            | 240,000 at $m/z$ 200                                                                        |
| Ion injection time    | 500 ms                                                                                      |
| Scan rate             | 1 / s                                                                                       |
| Spray voltage         | 3 kV                                                                                        |
| Capillary temperature | 250°C                                                                                       |
| Lock mass             | $m/z$ 716.12461 [5 DHB – 4 H <sub>2</sub> O + NH <sub>4</sub> ] <sup>+</sup> , none for DAN |
| Pixel size            | 10 $\mu$ m                                                                                  |

|                   |               |
|-------------------|---------------|
| <b>Mode</b>       | 2D pixel mode |
| <b>20% filter</b> | On            |
| <b>Attenuator</b> | 15-20°        |

### LC-MS/MS measurements

Table S3: LC gradient.

| Time / min | Mobile phase A / % | Mobile phase B / % |
|------------|--------------------|--------------------|
| 0          | 70                 | 30                 |
| 2          | 57                 | 43                 |
| 2.1        | 45                 | 55                 |
| 12         | 35                 | 65                 |
| 18         | 15                 | 85                 |
| 20         | 0                  | 100                |
| 25         | 0                  | 100                |
| 25.1       | 70                 | 30                 |
| 28         | 70                 | 30                 |

Table S4: Source parameters for LC-MS measurements.

| Parameter                         | Positive-ion mode | Negative-ion mode |
|-----------------------------------|-------------------|-------------------|
| Sheath gas / a.u.                 | 40                | 45                |
| Auxiliary gas / a.u.              | 15                | 12                |
| Sweep gas / a.u.                  | 2                 | 1                 |
| Spray voltage / kV                | 3.5               | 3.5               |
| Capillary temperature / °C        | 300               | 320               |
| S-lens RF                         | 50                | 55                |
| Auxiliary heater temperature / °C | 300               | 320               |

Table S5: MS parameters for LC-MS measurements, in ( ) for MS/MS.

| Parameters                  | Positive-ion mode                  | Negative-ion mode                  |
|-----------------------------|------------------------------------|------------------------------------|
| Run time / min              | 28                                 | 28                                 |
| Internal lock mass          | 391.28421                          | -                                  |
| Charge state                | 1                                  | 1                                  |
| Exclusion list [47]         | On                                 | -                                  |
| Resolution                  | 70k (35k)                          | 70k (35k)                          |
| AGC target                  | 10 <sup>6</sup> (10 <sup>5</sup> ) | 10 <sup>6</sup> (10 <sup>5</sup> ) |
| Maximum injection time / ms | 250 (75)                           | 250 (75)                           |
| Scan range                  | 200-1800                           | 200-1800                           |
| Top N                       | 15                                 | 15                                 |
| Isolation window / m/z      | 1                                  | 1                                  |
| Stepped NCE                 | 25, 30                             | 20, 30, 40                         |
| Underfill ration / %        | 0.6                                | 0.6                                |
| Intensity threshold         | 8·10 <sup>3</sup>                  | 8·10 <sup>3</sup>                  |
| Exclude isotopes            | On                                 | On                                 |
| Dynamic exclusion / s       | 8                                  | 8                                  |

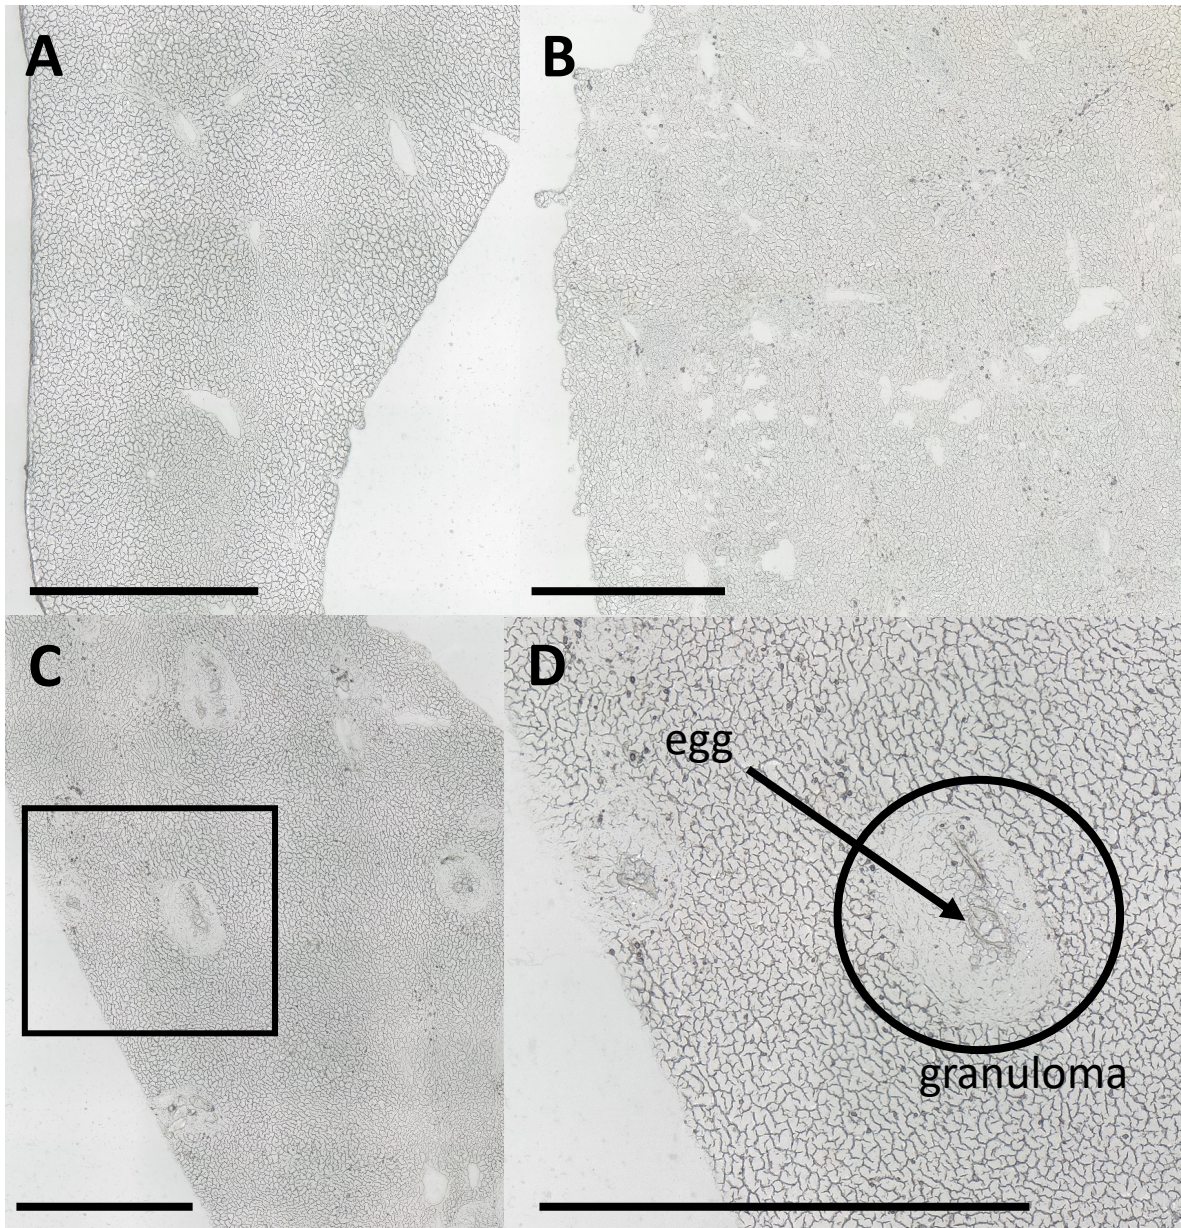

Figure S1: Light microscopic images of hamster liver cryosections of 20  $\mu\text{m}$  thickness. (A) Non-infected, (B) monosex-infected, (C) bisex-infected, (D) zoomed area of (C), showing a nested egg and inflammation area around egg; scale bars are 1 mm.

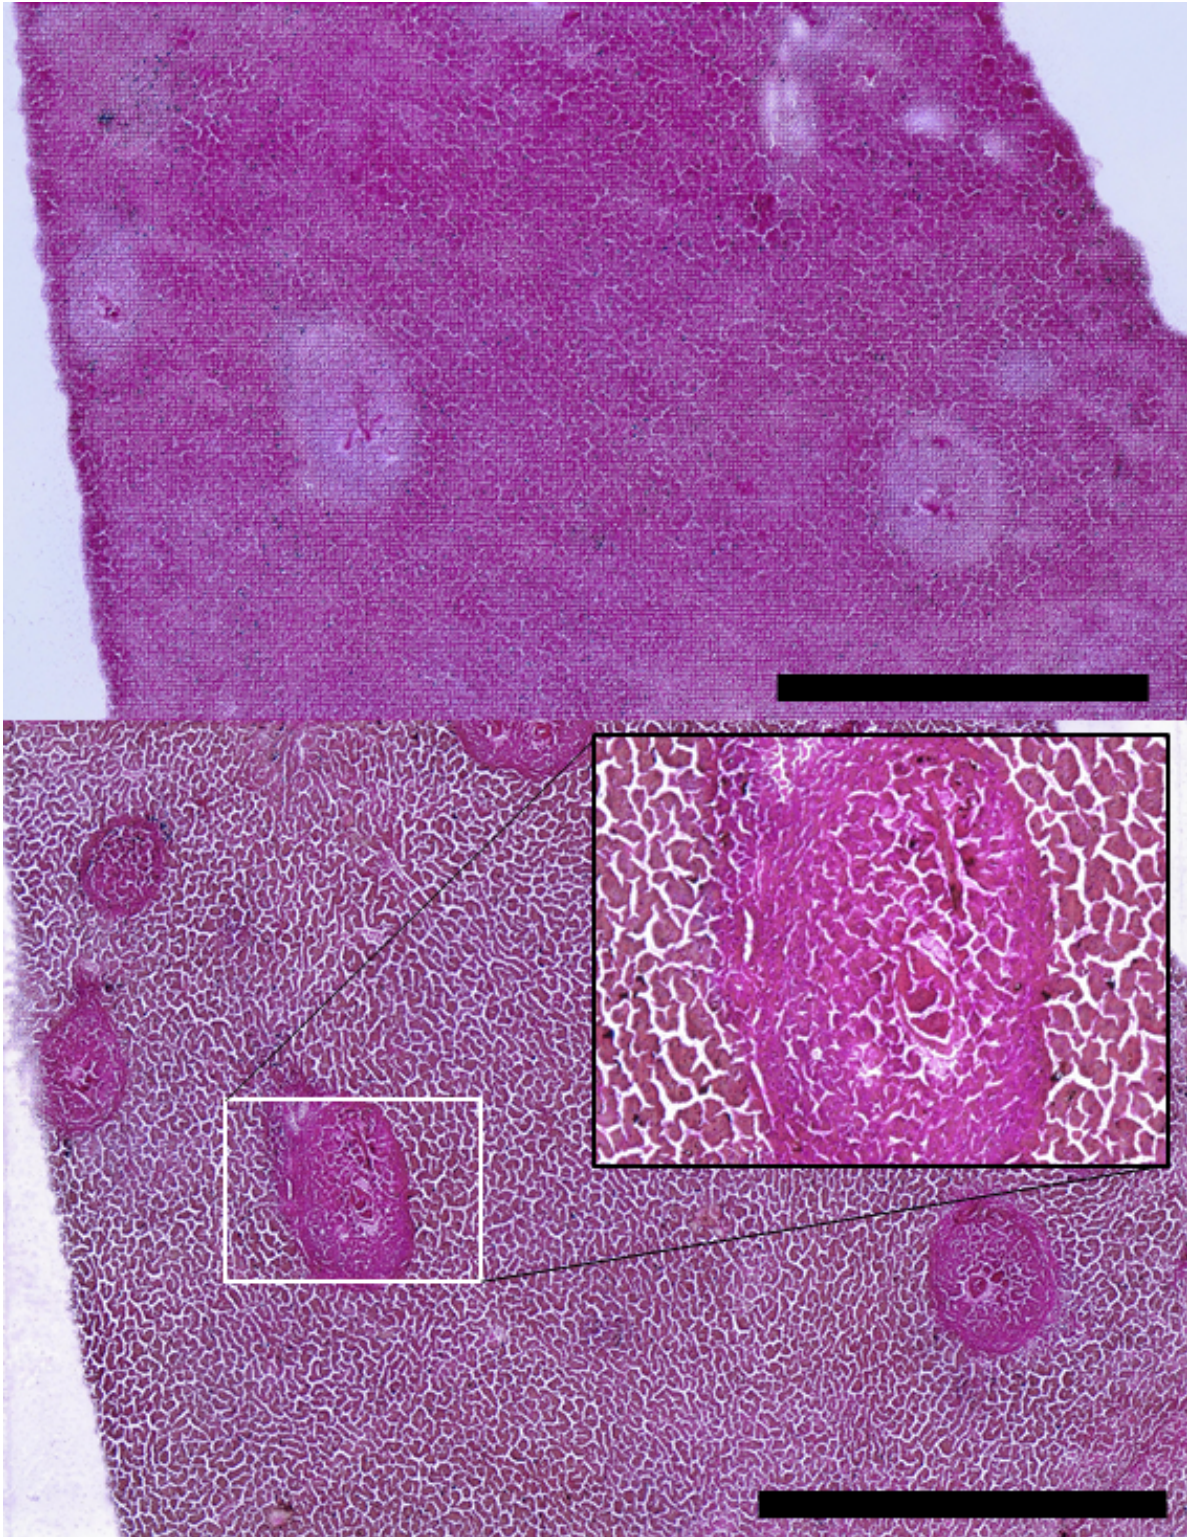

*Figure S2: H&E stained sections of bisex-infected sample 2. Staining was performed after MSI measurements, therefore laser ablation spots are clearly visible. However, granuloma can still be identified around the eggs.*

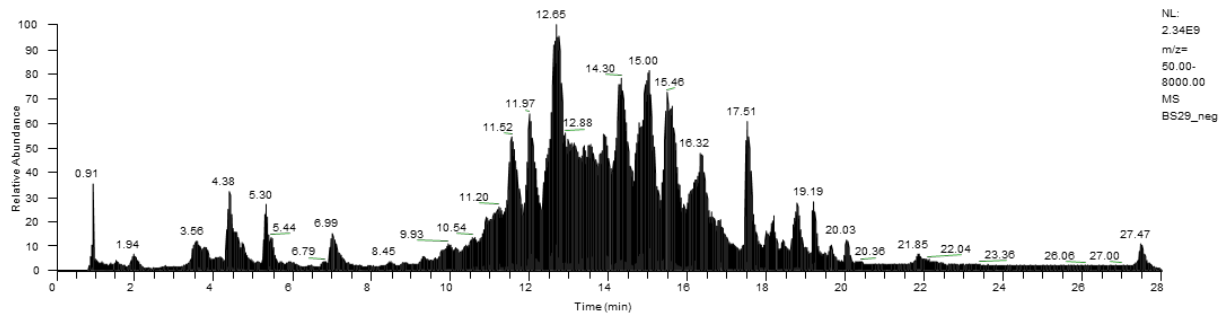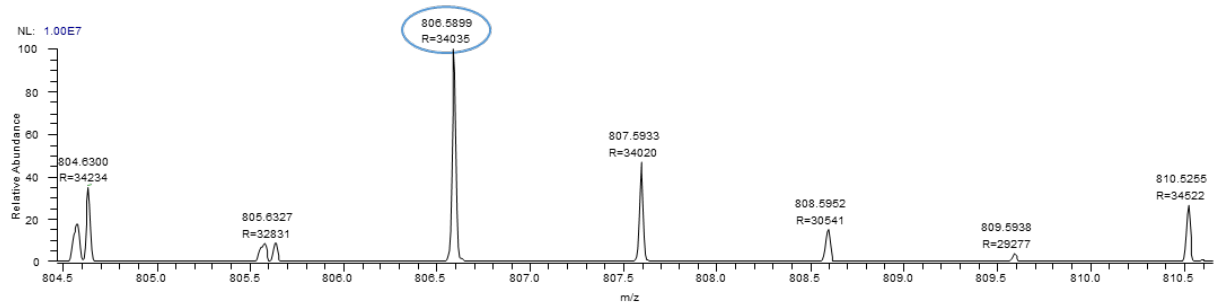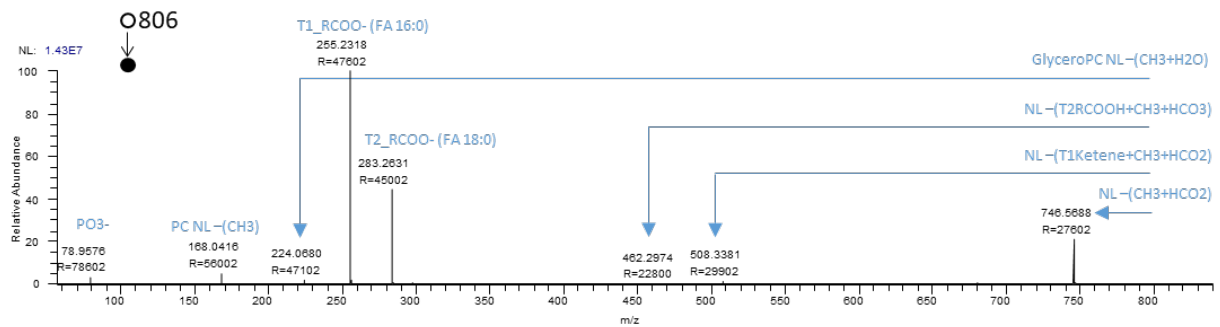

Figure S3: Exemplary LC-MS/MS spectra. In the upper part, the chromatogram of the LC separation is shown. In the middle, a zoom of the full MS spectra can be found. The peak of interest is marked with a blue circle. The lower part shows the MS/MS spectra of the peak of interest. Fragment ions and losses are stated in blue.

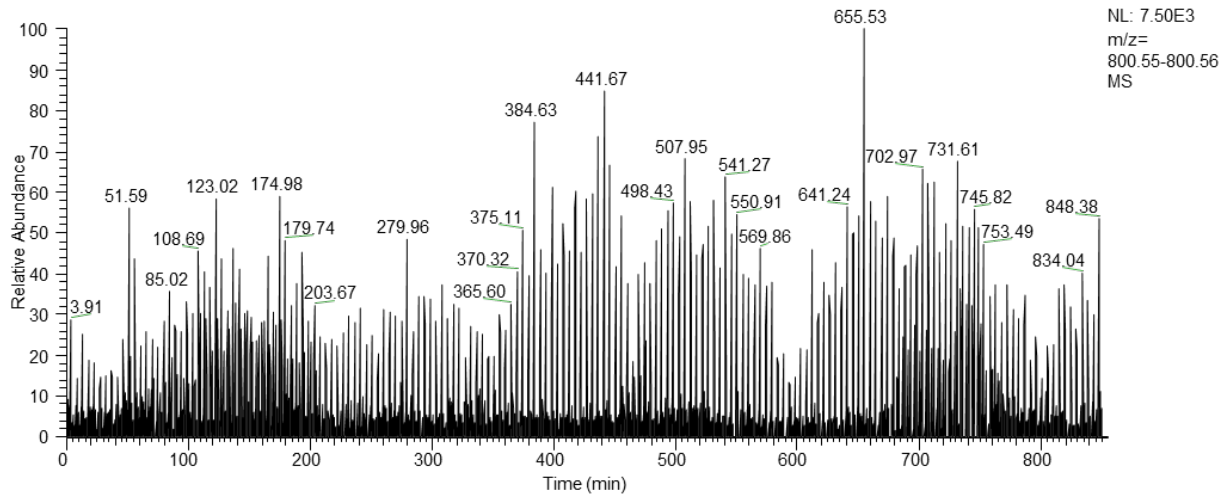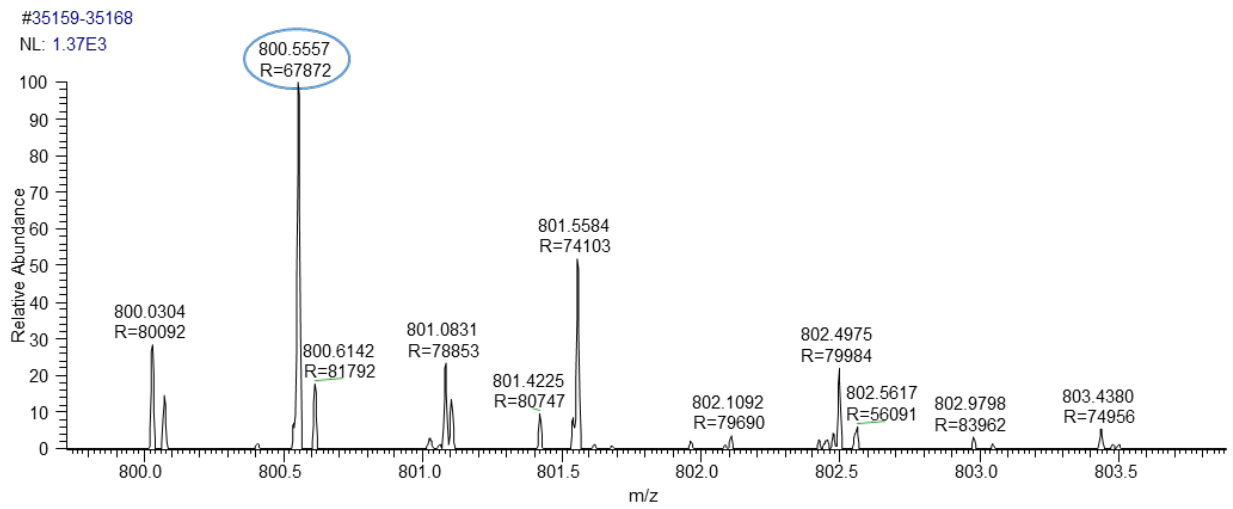

Figure S4: Exemplary MALDI spectrum. In the upper part, the extracted ion chromatogram of  $m/z$  800.5557 is shown. The lower part shows the summed spectrum. The ion of interest is marked with a blue circle. According to the LC-MS/MS data, this peak belongs to PC(16:0\_18:0)  $[M+K]^+$ .

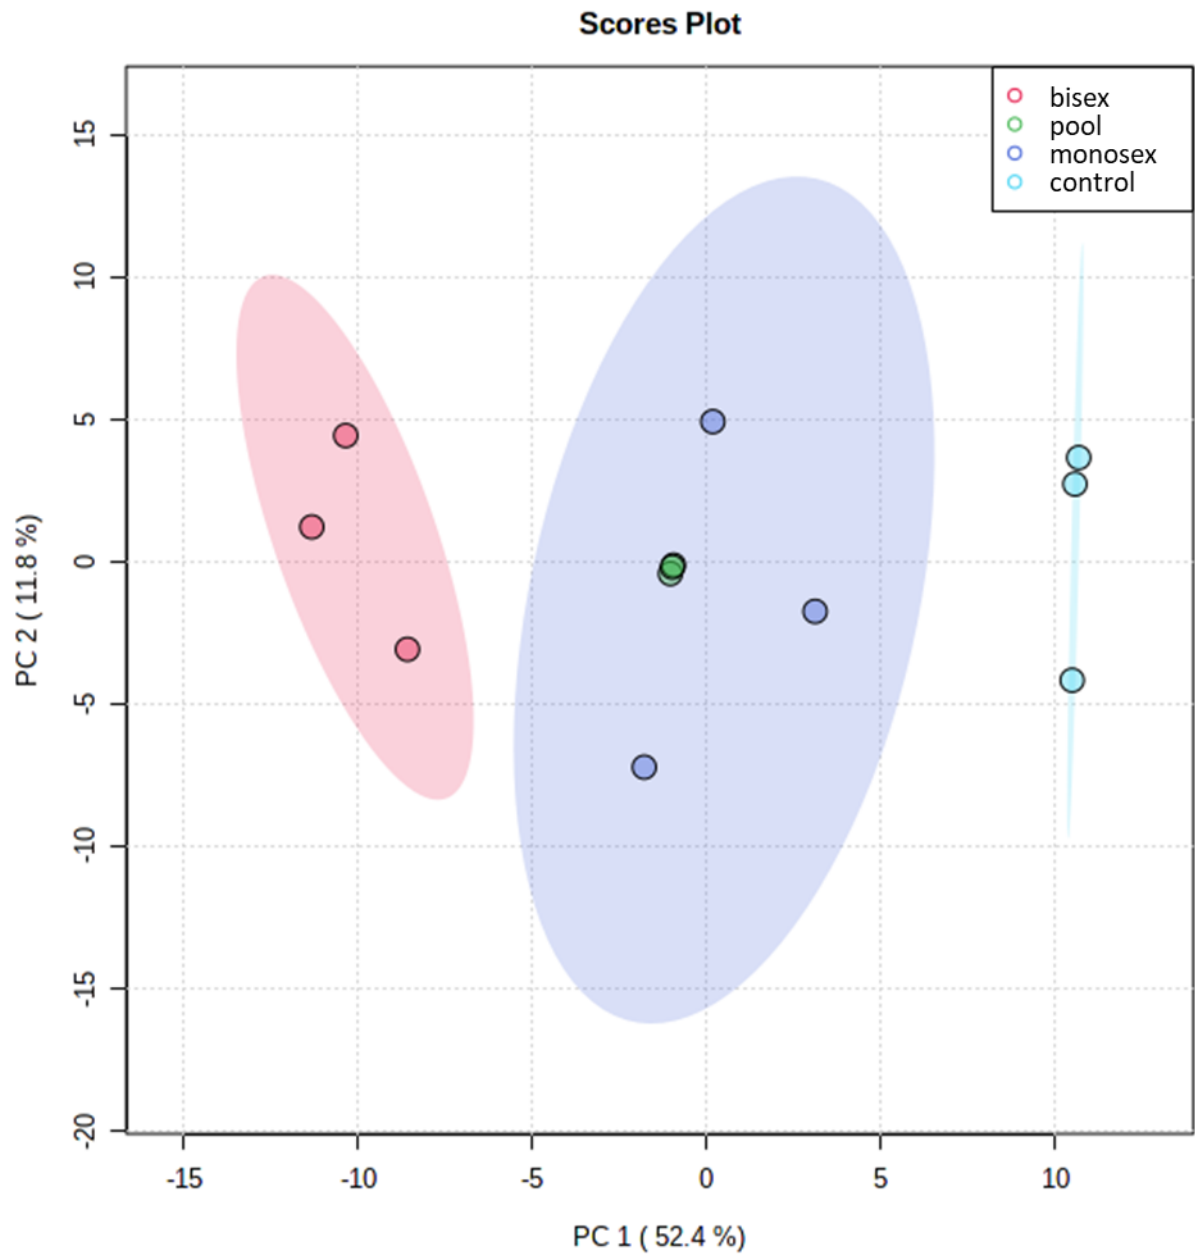

Figure S5: PCA scores plot from MetaboAnalyst[36], showing that the three sample groups are clearly distinguishable. The pool samples group nicely on nearly the same point, what is reasonable since they are only technical replicates.



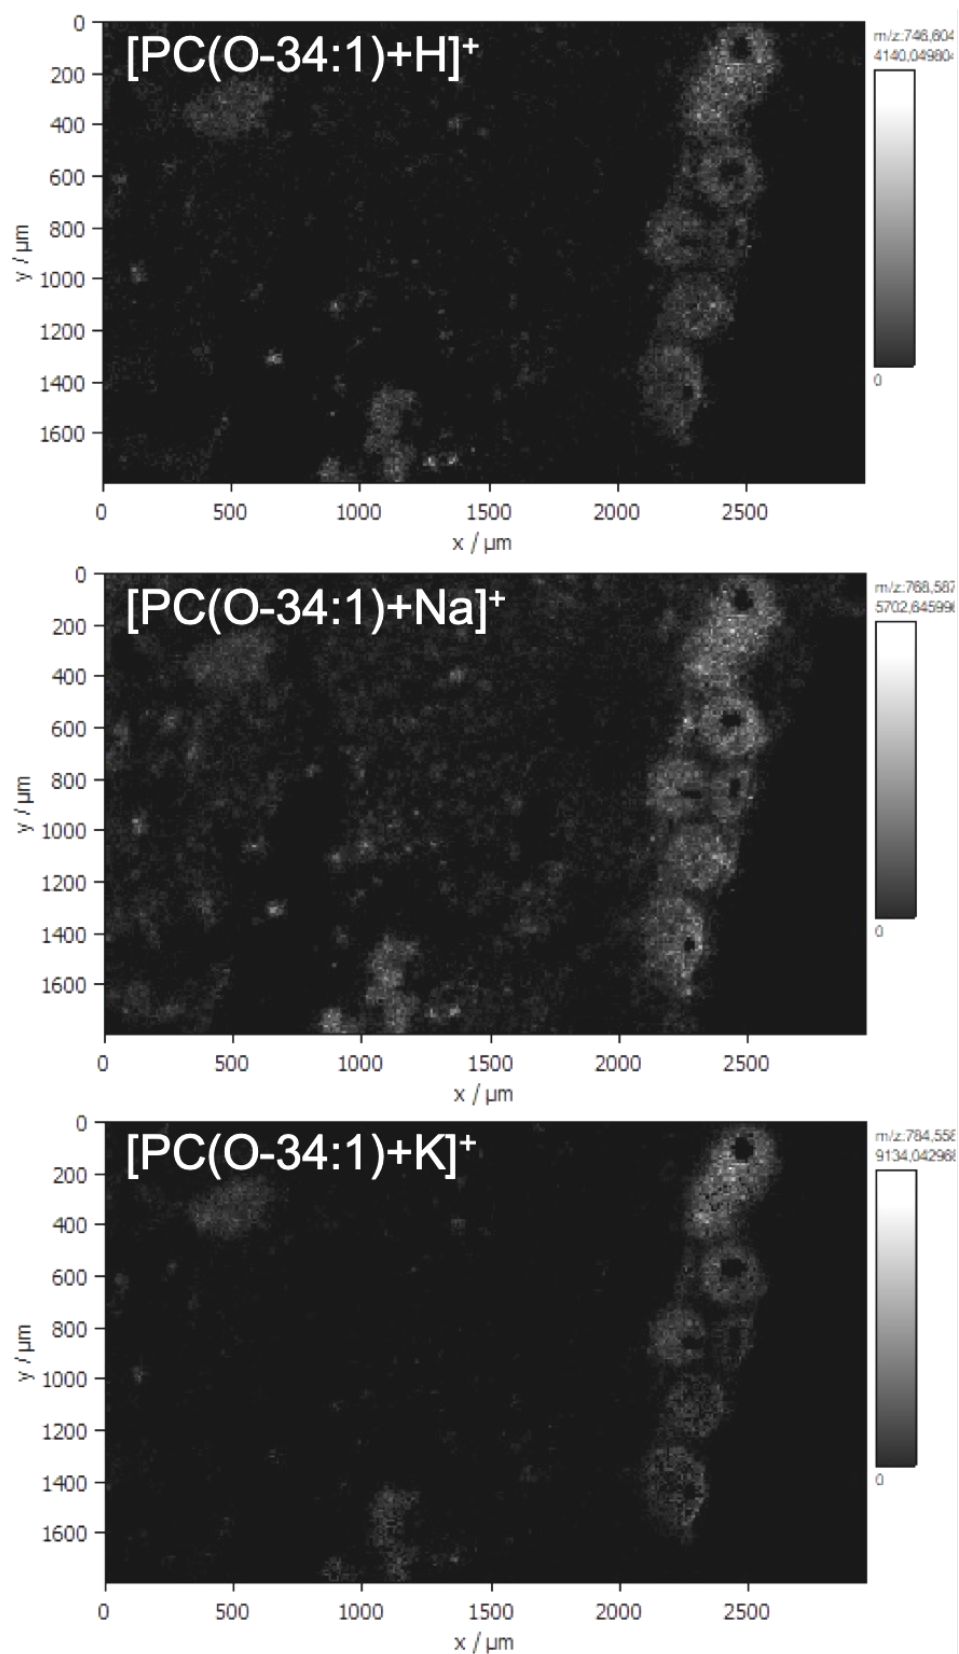

Figure S6: Comparison of different adducts for one lipid. Nearly the same distribution patterns were found. However, for most of the lipids, not all adducts were observed.

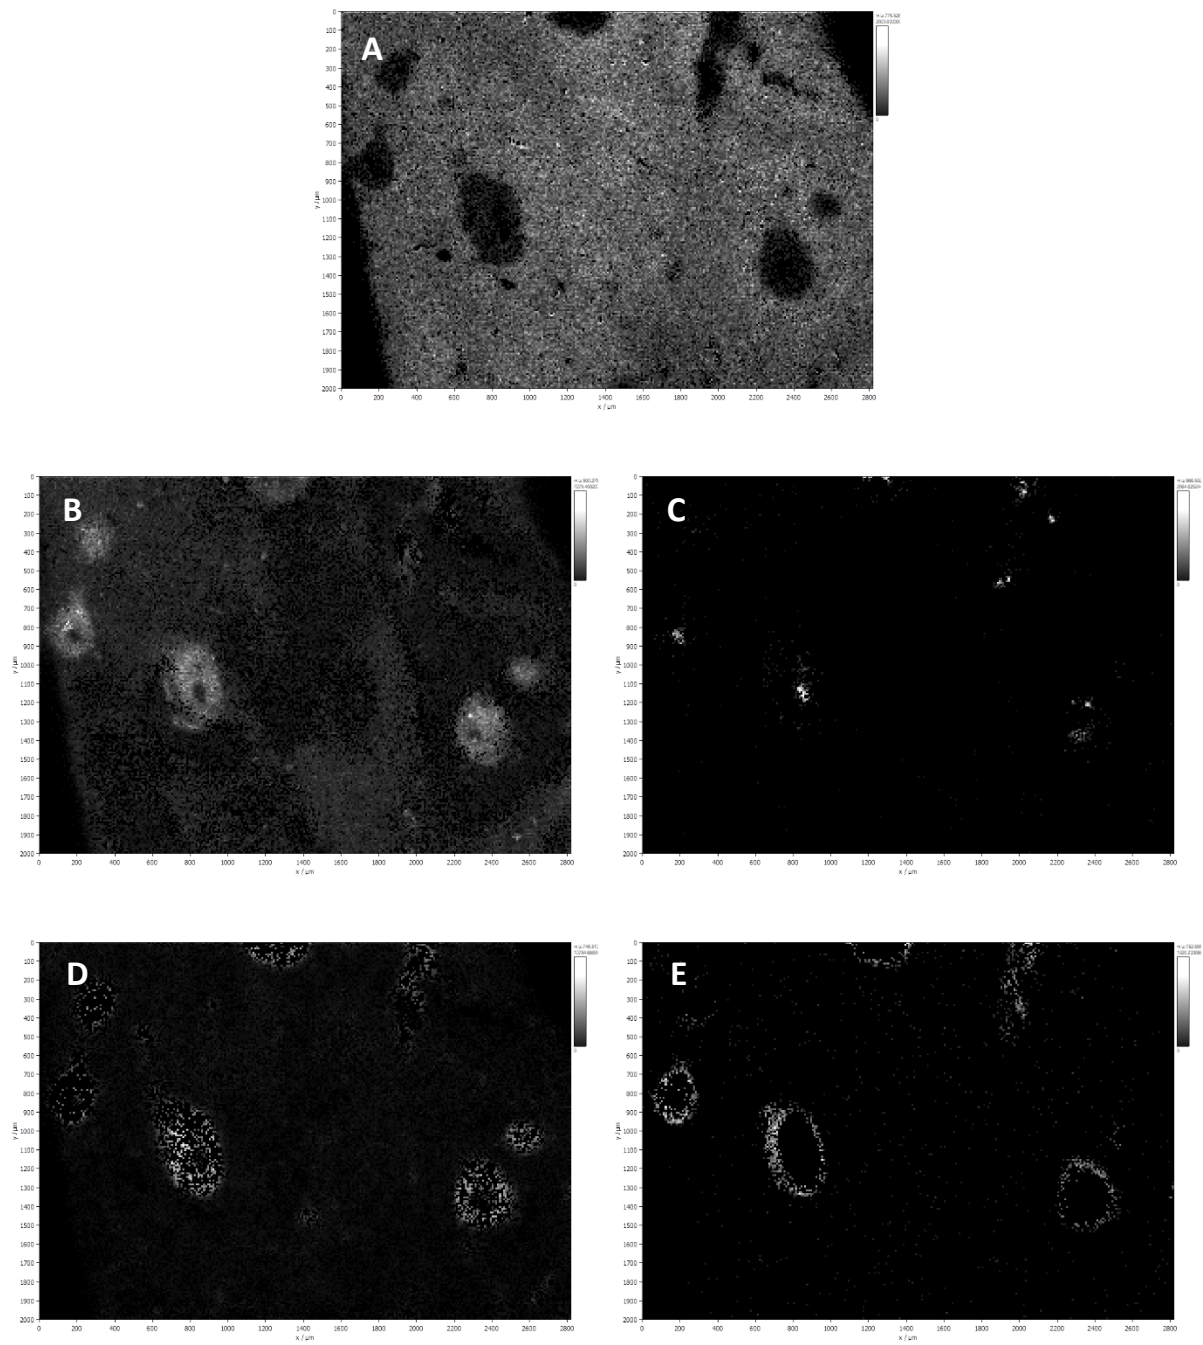

Figure S7: Single-ion images that were used for overlays of a bisex-infected sample as shown in Figure 5. A:  $m/z$  776.526946, MMPE(16:0\_22:6),  $[M-H]^-$ , B:  $m/z$  500.275684, LPE(20:4),  $[M-H]^-$ , C:  $m/z$  866.592639, PS(42:4),  $[M-H]^-$ , D:  $m/z$  746.511353, plasmeyl-PE(P-16:0/22:6),  $[M-H]^-$ , E:  $m/z$  752.555581, plasmanylyl-PE(O-18:0/20:4),  $[M-H]^-$ .

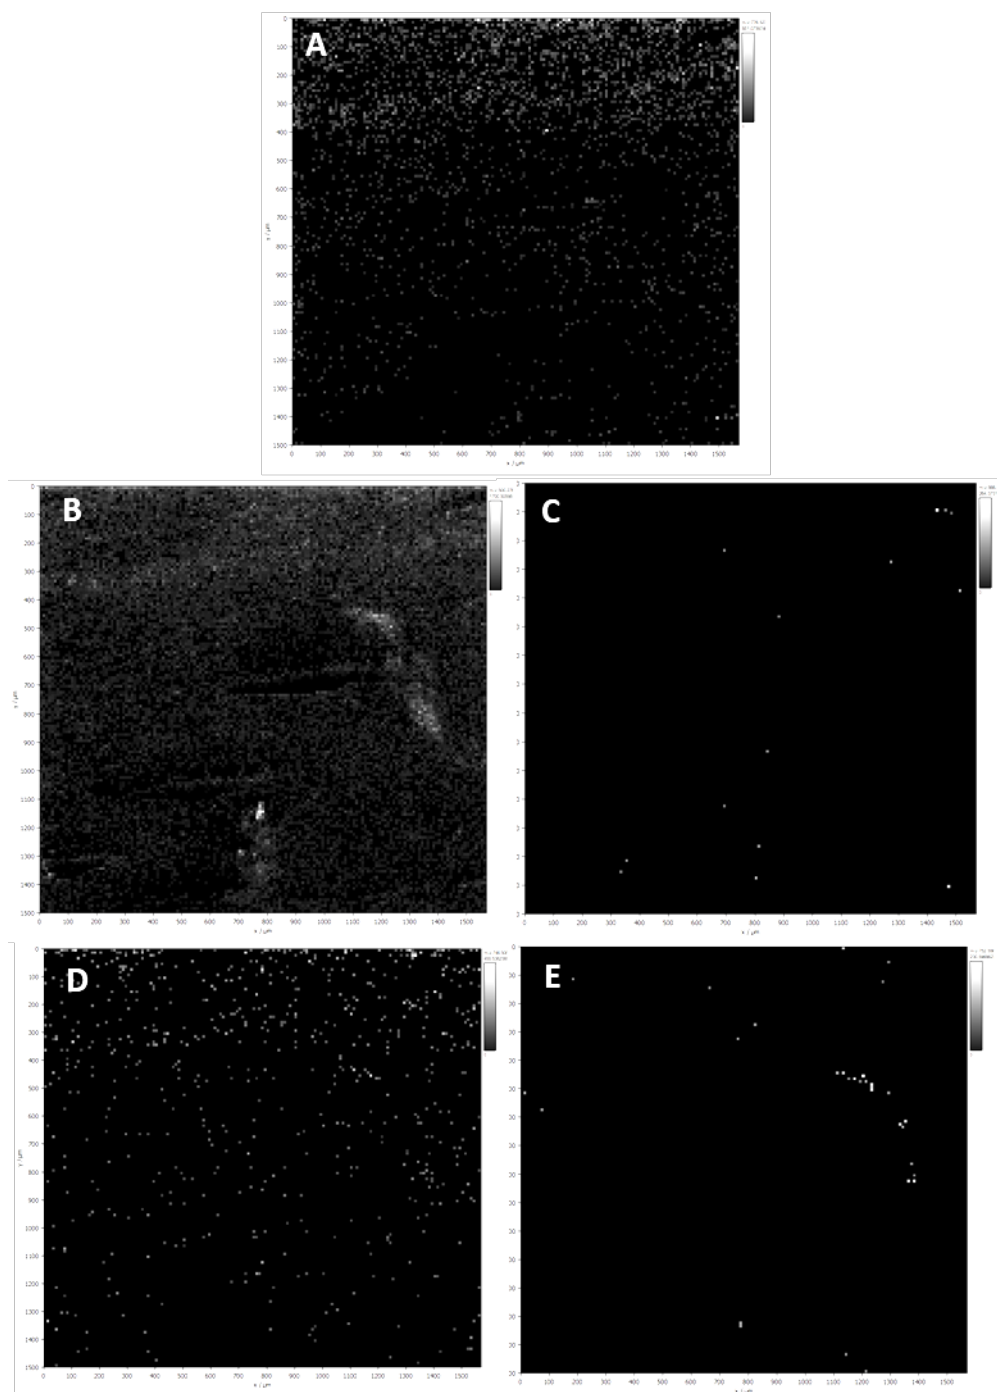

Figure S8: Single-ion images that were used for overlays of a control sample as shown in Figure 5. A:  $m/z$  776.526946, MMPE(16:0\_22:6),  $[M-H]^-$ , B:  $m/z$  500.275684, LPE(20:4),  $[M-H]^-$ , C:  $m/z$  866.592639, PS(42:4),  $[M-H]^-$ , D:  $m/z$  746.511353, plasmeyl-PE(P-16:0/22:6),  $[M-H]^-$ , E:  $m/z$  752.555581, plasmany-PE(O-18:0/20:4),  $[M-H]^-$ .

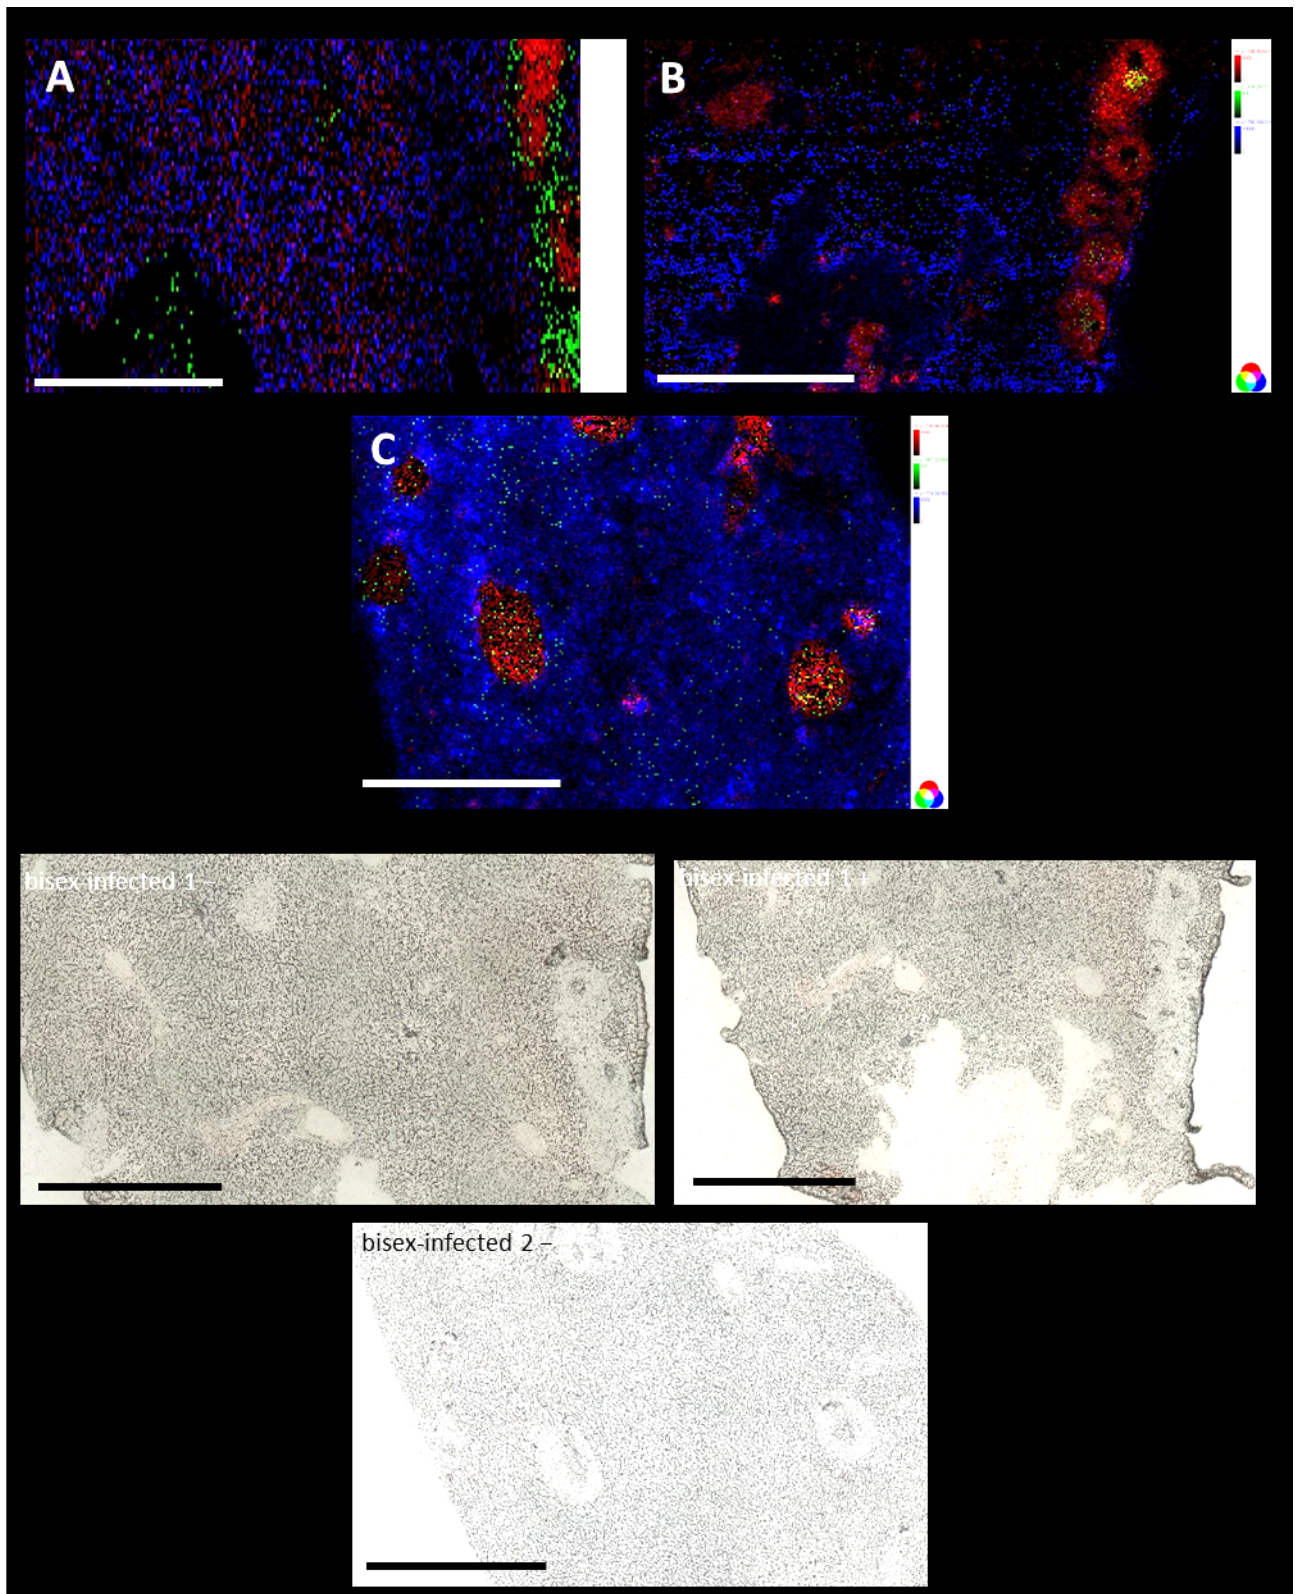

Figure S9: Upper part: Overlay MS images based on markers found by LC-MS/MS analysis. For A,  $m/z$  836.545472, tentatively assigned to PS(40:5),  $[M-H]^-$  was found to be a marker for granuloma,  $m/z$  788.529391, DMPE(18:3\_20:4),  $[M-H]^-$  a marker for surrounding tissue and  $m/z$  752.557091, plasmanyl-PE (O-18:0\_20:4),  $[M-H]^-$  a marker for the outer part of the granuloma. For B,  $m/z$  746.604414, plasmanyl-PC(O-16:1\_18:0),  $[M+H]^+$  was found to be a marker for granuloma,  $m/z$  780.550319, PE(17:0\_22:5),  $[M+H]^+$  a marker for surrounding tissue and  $m/z$  438.297017, plasmeryl-LPE (P-16:0),  $[M+H]^+$  as a marker for an enrichment inside the granuloma. For C,  $m/z$  728.561836, plasmeryl-PE(P-18:0\_18:1) or plasmanyl-PE(O-18:0\_18:2),  $[M-H]^-$  as a marker for granuloma and  $m/z$  867.520849, PG(22:5\_22:6),  $[M-H]^-$  as a marker for an enrichment inside the granuloma.  $m/z$  774.541653, plasmeryl-PE(P-18:0\_22:6),  $[M-H]^-$  was taken as a marker for surrounding tissue. Lower part: Corresponding microscopically images. Scale bars are 1 mm.

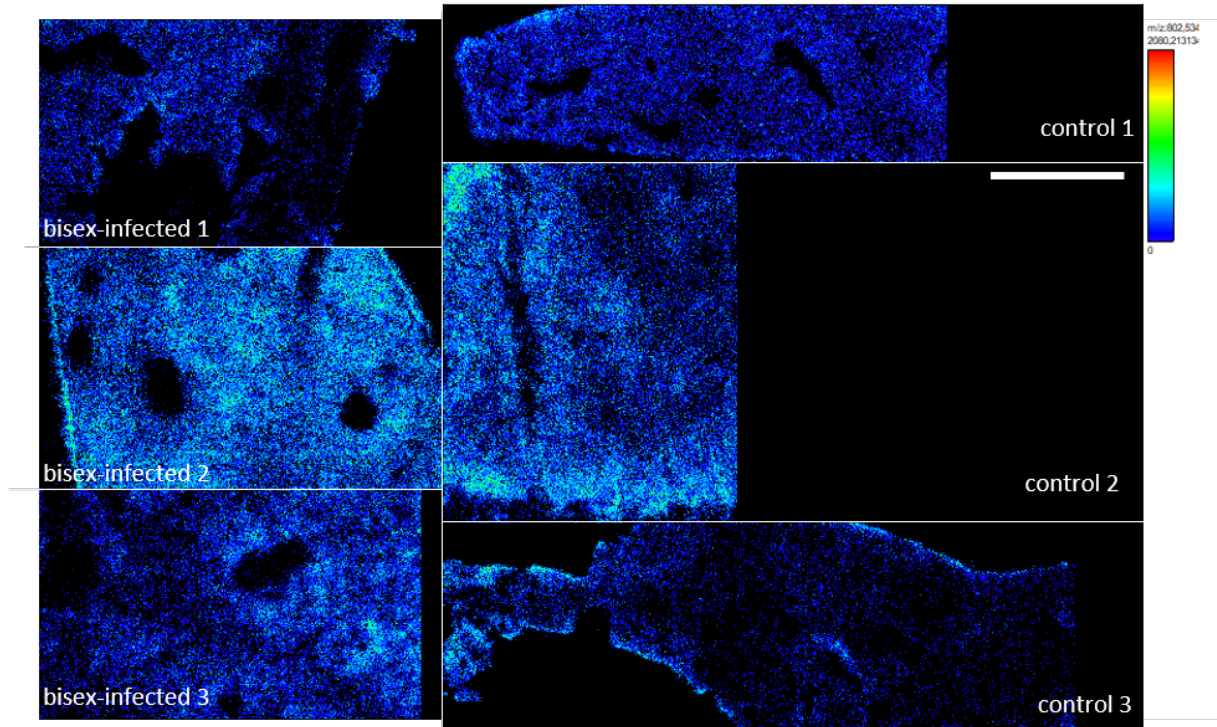

Figure S10: Lateral distribution of PC(16:0\_20:5) at  $m/z$  802.535727 as  $[M+Na]^+$ . While the lipid is depleted in the area of granulomas of liver samples of bisex-infected hamsters (left), it is evenly distributed in the control samples (right). Scale bars are 1 mm.

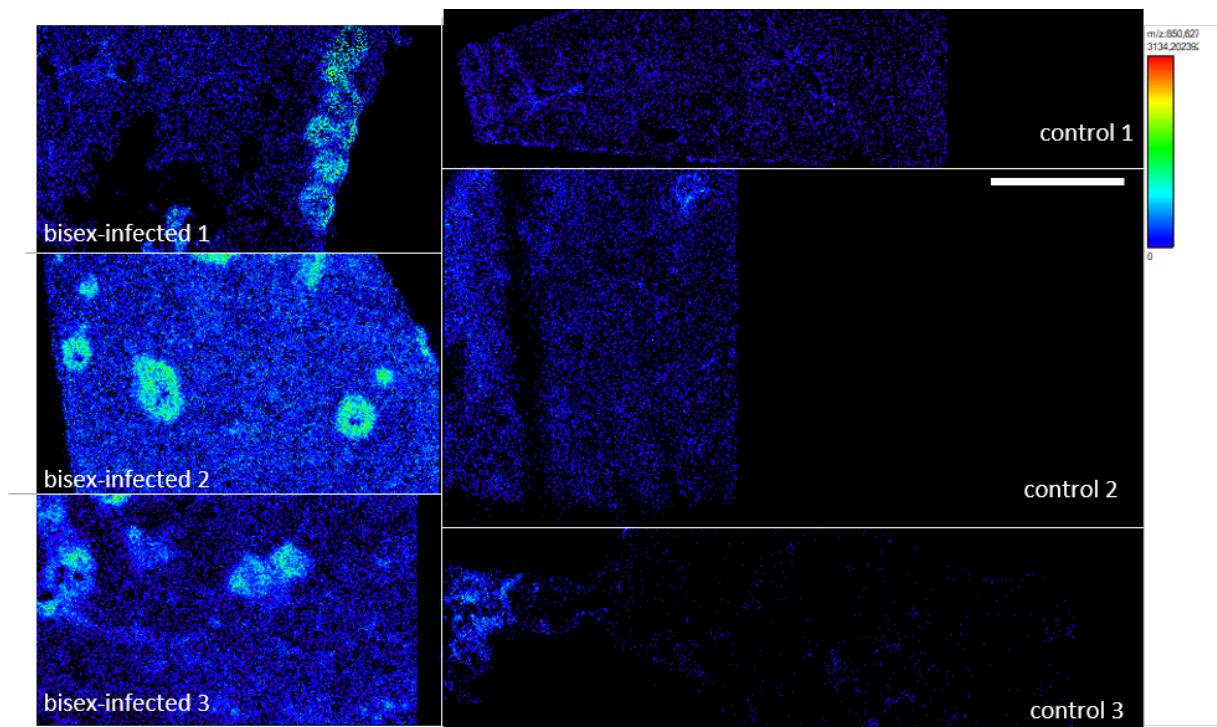

Figure S11: Lateral distribution of PC(19:0\_20:2) at  $m/z$  850.629627 as  $[M+Na]^+$ . While the lipid is evenly distributed in the control samples (right), enrichment in the granulomas is recognizable in liver samples of bisex-infected hamsters (left). However, the lipid is still detectable in the non-affected parts of the tissue. Scale bars are 1 mm.

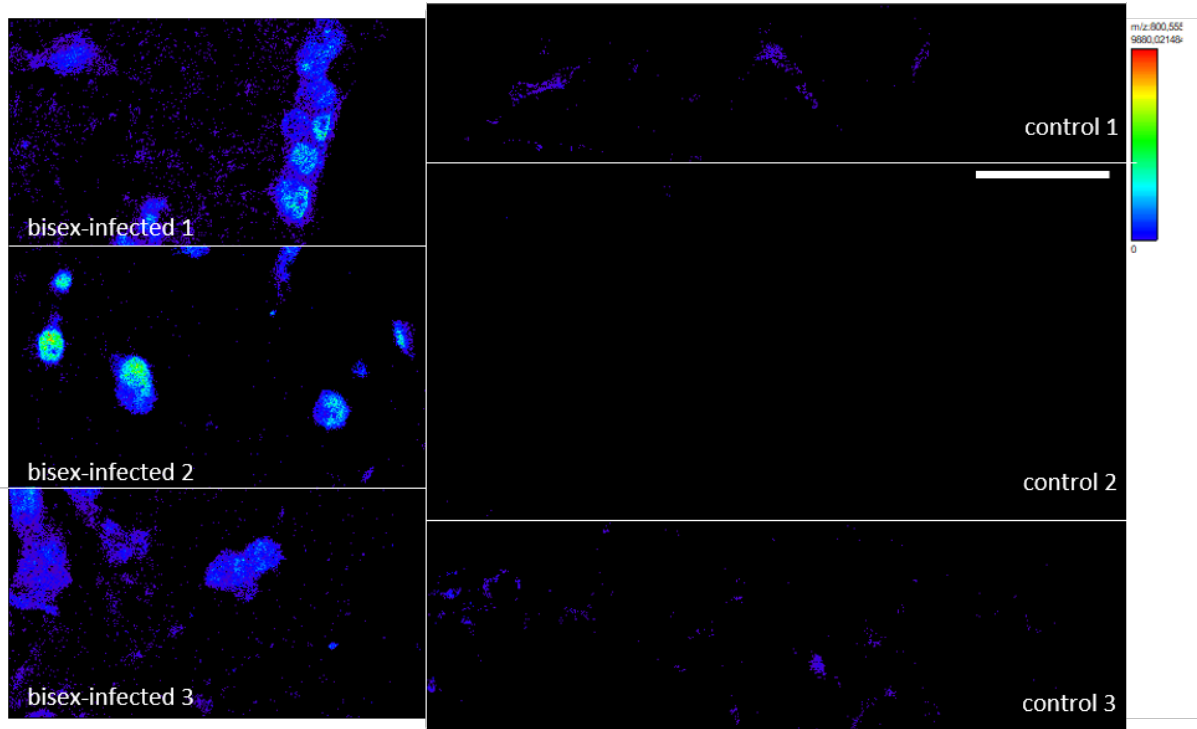

Figure S12: Lateral distribution of PC(16:0\_18:0) at  $m/z$  800.55617 as  $[M+K]^+$ . While the lipid was not found in the control samples (right), strong enrichment in the granulomas is recognizable in liver samples of bisex-infected hamsters (left). The lipid species was found accumulated especially in direct contact around the eggs. Scale bars are 1 mm.

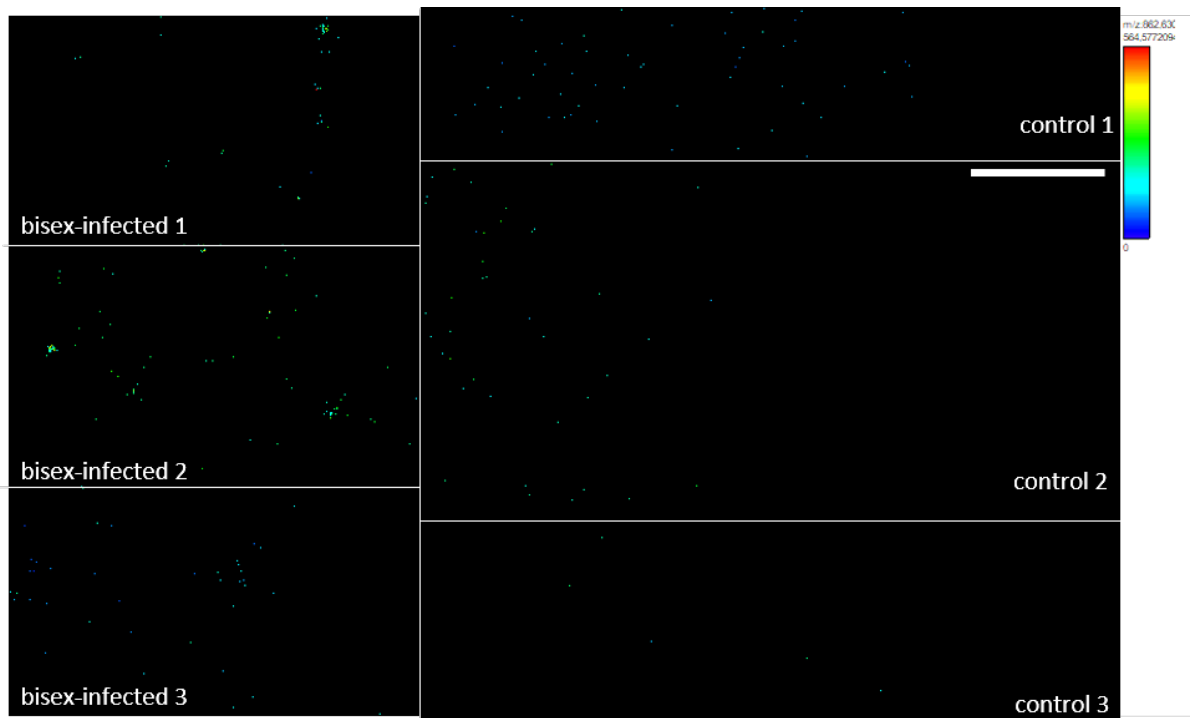

Figure S13: Lateral distribution of PC(20:0\_20:3) at  $m/z$  862.630305 as  $[M+Na]^+$ . The lipid was neither found in the control samples, nor in the non-affected tissue of liver samples of bisex-infected hamsters but was only found in and directly around the eggs. Scale bars are 1 mm.

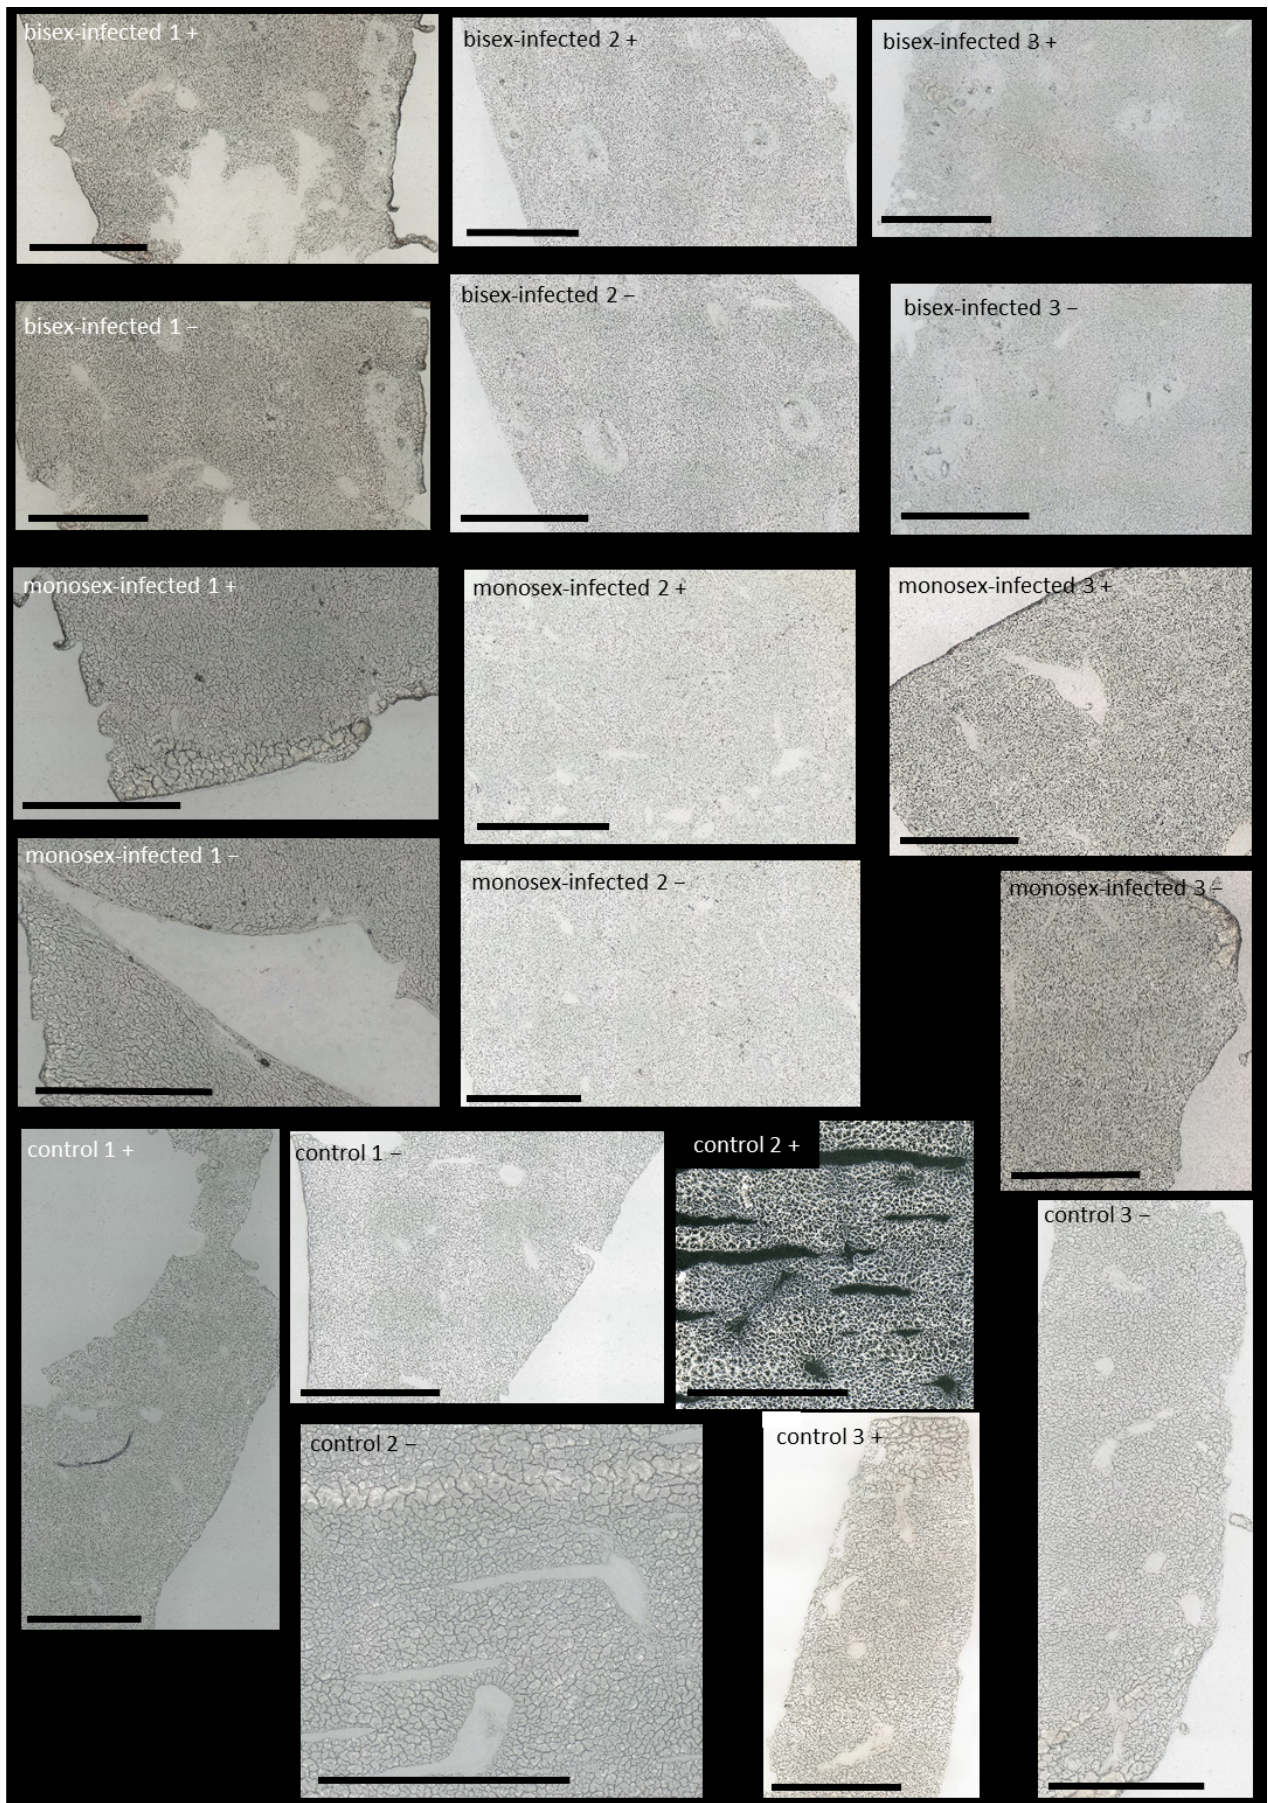

Figure S14: Microscopical images of all samples used for MALDI MSI experiments. Pictures were taken before matrix application and measurement. Scale bars are 1 mm.
